# Supplementary material for: Discrepancies between cortical and behavioural long‐term readouts of hyperalgesia in awake freely moving rats
Source: PubMed Central journal article supplement (PMC5096034; doi:10.1002/ejp.892), 2016-05-05
Supplement: EJP-20-1689-s001.pdf [file EJP-20-1689-s001.pdf]

**FIGS1**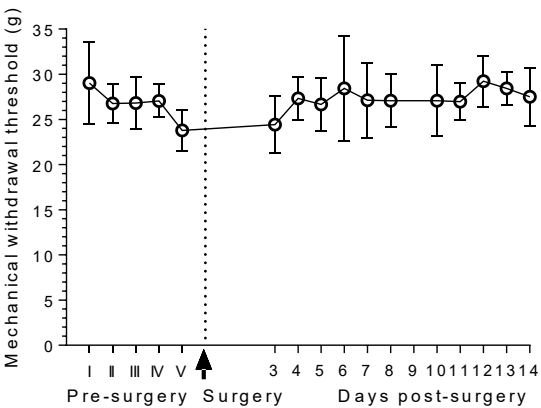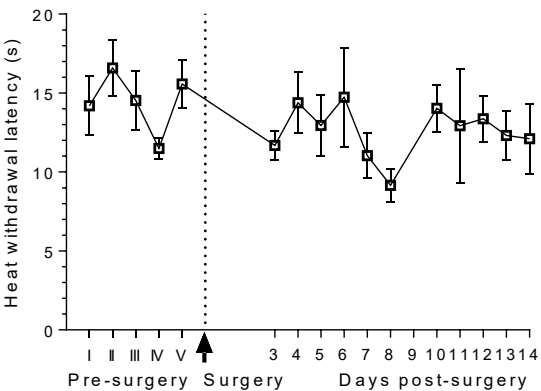

FigureS1: Controlling for potential effects of surgery and implantation on mechanical withdrawal threshold (upper panel) and heat withdrawal latency (lower panel). Roman numerals indicate consecutive test occasions Pre-surgery. Arrows indicate time of surgery. Time course post-surgery is indicated by daily tests (except Day9); symbols depict mean and SEM. No significant changes were seen due to surgery (one-way ANOVA (entries g) resp. h) in tableS1) followed by a Tukey's post hoc test; n=7 for both groups). Animals were UVB irradiated (cf. Figs 4 and 5) after testing on Day14.
